# Supplementary material for: Modifiable Risk Factors and Residual Risk Following Coronary Revascularization: Insights From a Regionalized Dedicated Follow-Up Clinic
Source: PubMed Central journal article supplement (PMC8654638; doi:10.1016/j.mayocpiqo.2021.09.001), 2021-12-04
Supplement: mmc1.pdf [file mmc1.pdf]

**Supplemental Files**

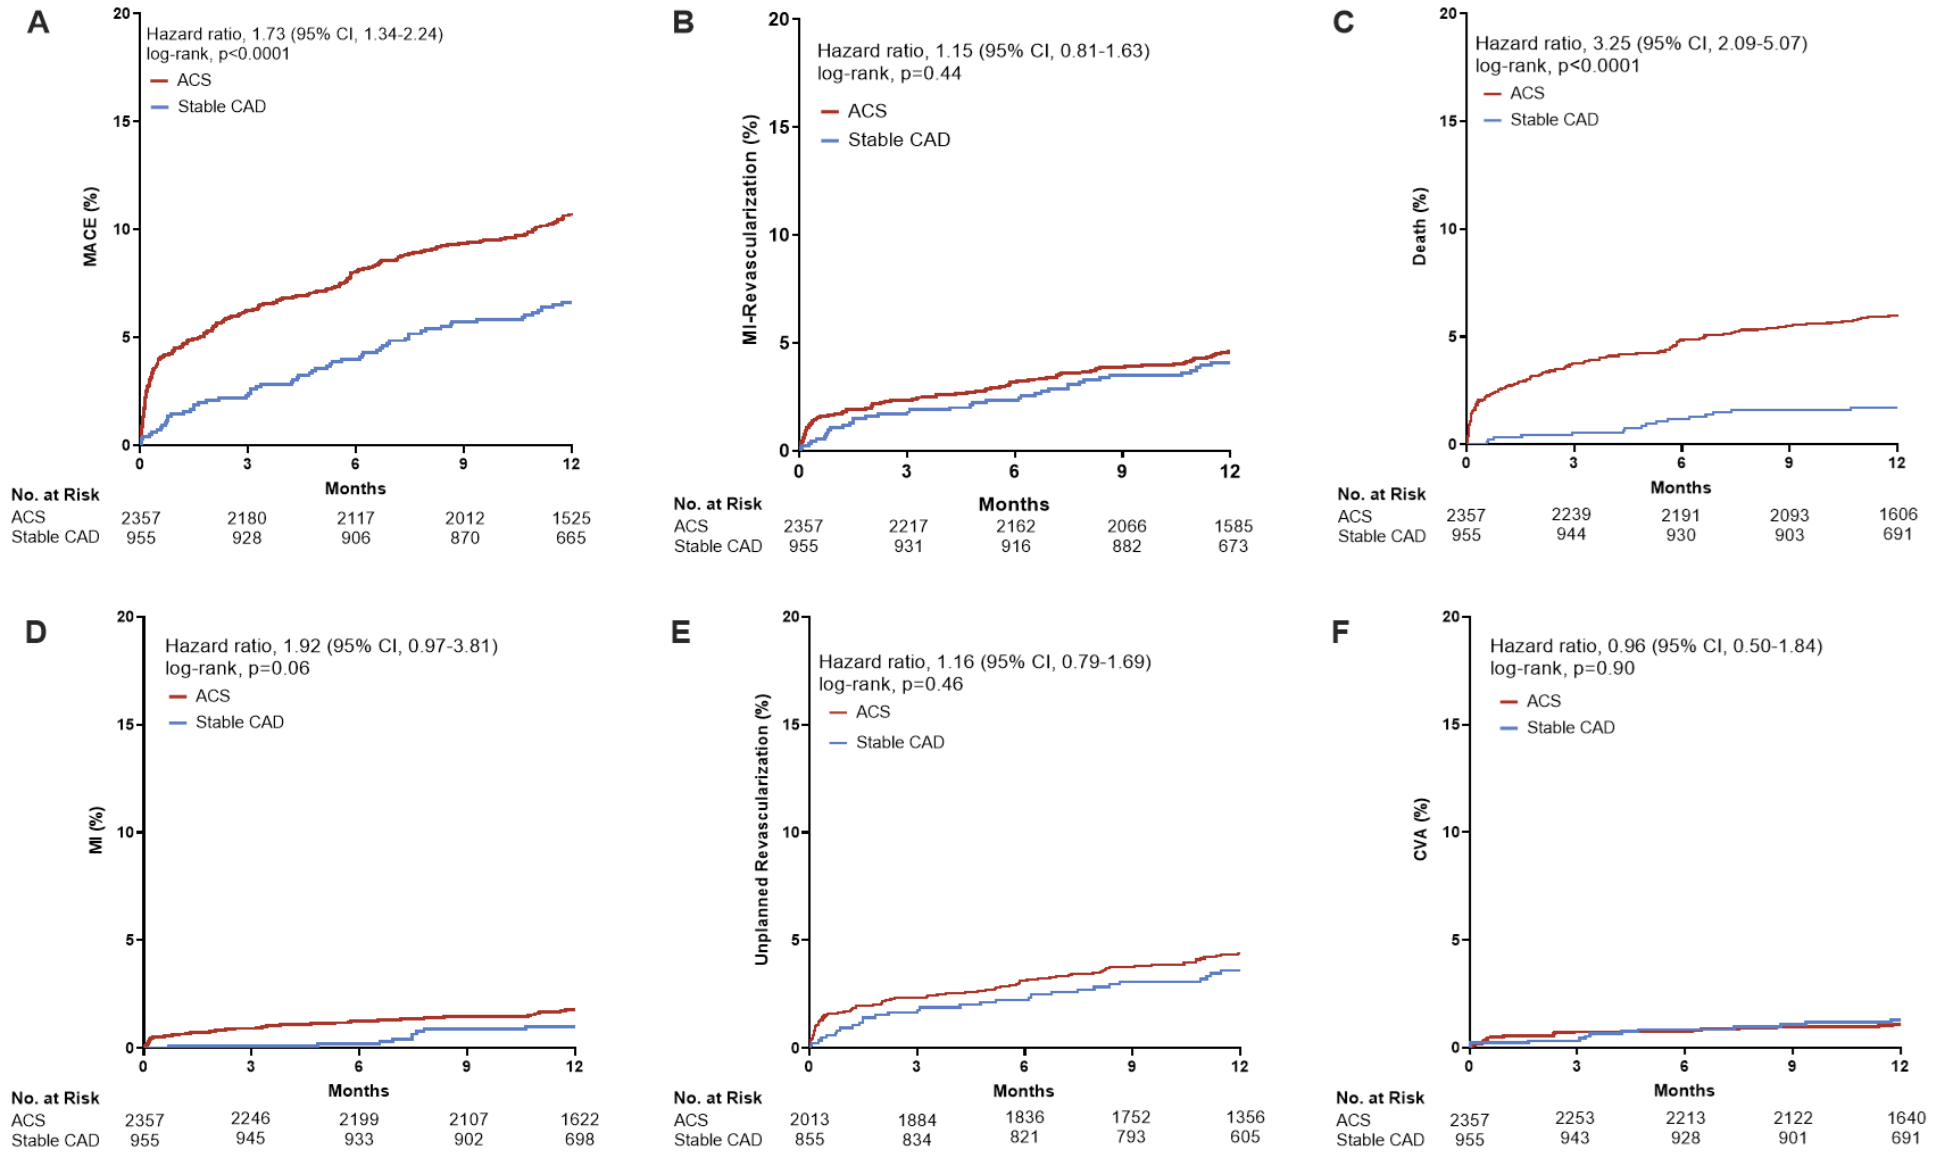

**Supplemental Figure 1. Impact of acute coronary syndrome (ACS) on clinical outcomes.** ACS patients noted to have elevated rates of MACE (A) and death (C) when compared to stable CAD controls, no differences in MI-revascularization (B), MI (D), revascularization (E), or CVA (F).

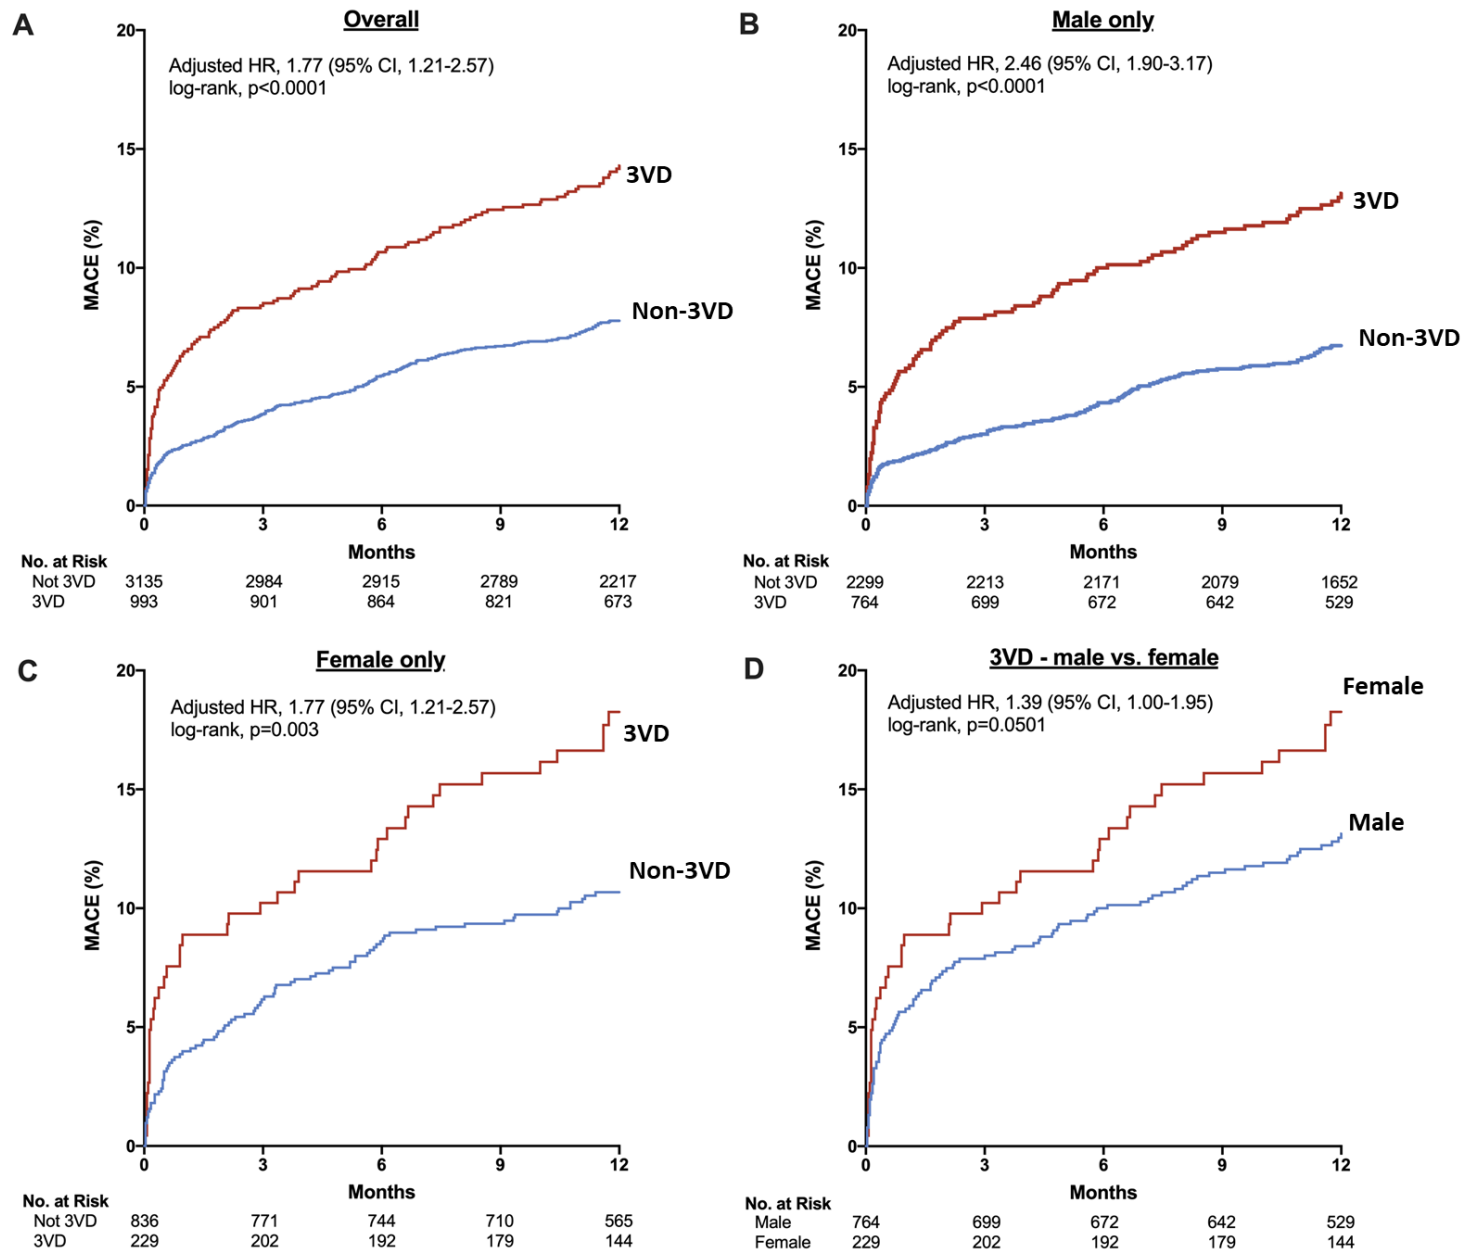

**Supplemental Figure 2. Sex-based impact of coronary artery disease (CAD) burden on clinical outcomes.** (A) Total cohort dichotomized into those with (3VD) or without three-vessel CAD (non-3VD). Sex-based differences of the impact of 3VD vs non-3VD assessed in males (B) and females (C). (D) When assessing strictly those with 3VD females demonstrate more adverse events than males. MACE – major adverse cardiac events - death, myocardial infarction, cerebrovascular accident, unplanned revascularization. Hazard ratios (HR) and 95% confidence intervals (CI) presented for outcomes of 3VD compared to non-3VD and females compared to males.

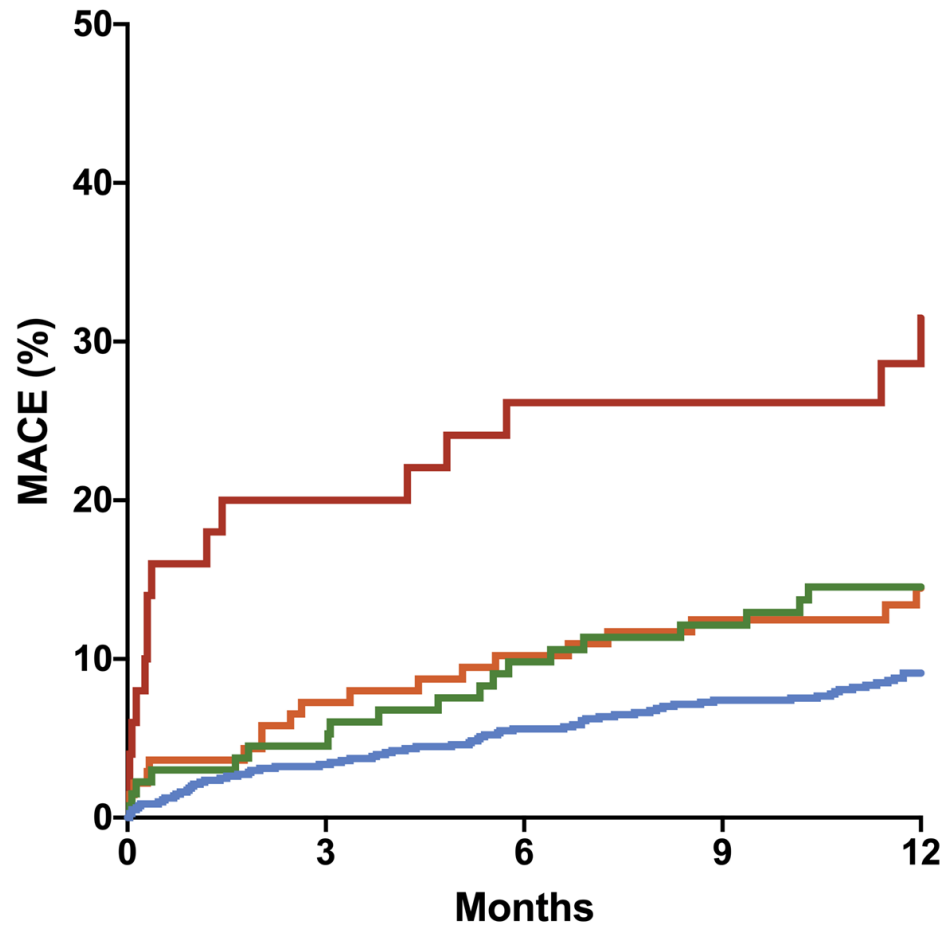

| No. at Risk |     |     |     |     |     |  |
|-------------|-----|-----|-----|-----|-----|--|
| Normal      | 810 | 776 | 749 | 709 | 551 |  |
| ≥ 45%       | 133 | 126 | 118 | 113 | 90  |  |
| 30-45%      | 138 | 127 | 121 | 112 | 81  |  |
| < 30%       | 51  | 39  | 36  | 34  | 24  |  |

**Supplemental Figure 3. Impact of left ventricular function on clinical outcomes.** Clinical outcomes stratified by left ventricular function on presentation (<30% -red, 30-45%-orange, ≥45%-orange, ≥55%-blue) demonstrating deteriorating clinical outcomes with worsening LV function. MACE – major adverse cardiac events - death, myocardial infarction, cerebrovascular accident, unplanned revascularization.

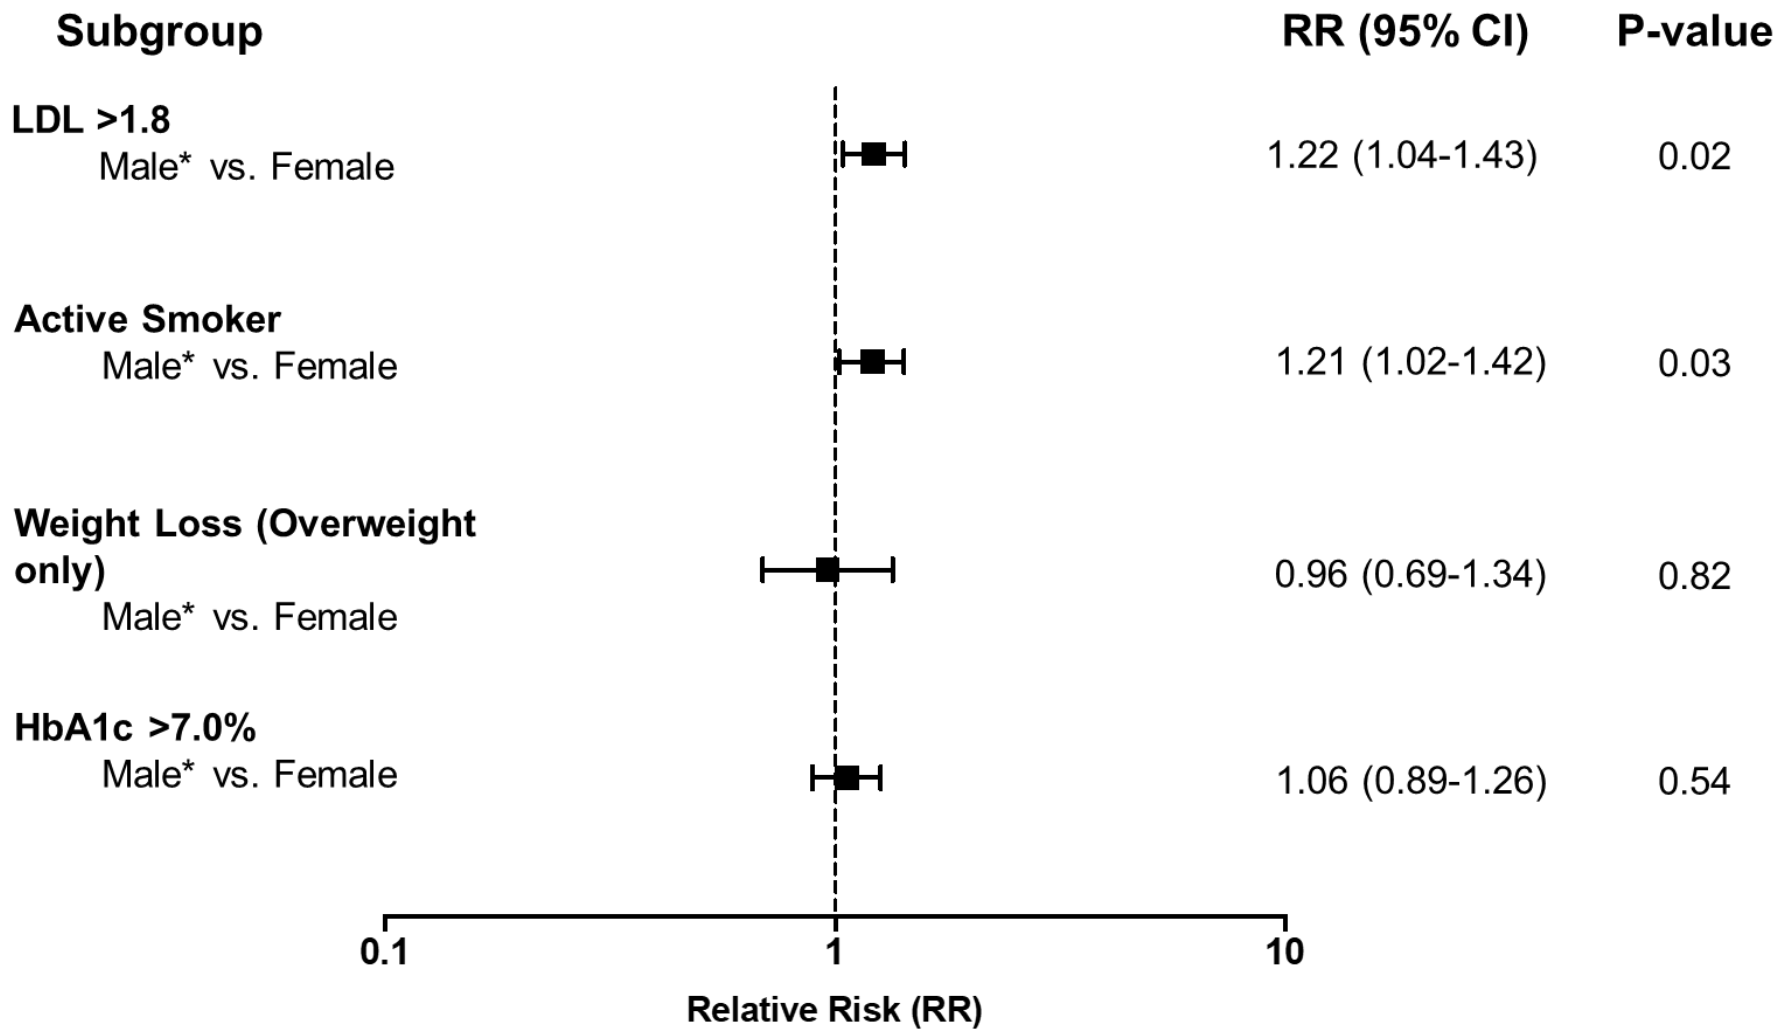

**Supplemental Figure 4. Sex-based differences in optimal risk factor management.** Subgroup analysis of risk factor control stratified by sex.

Unadjusted relative risk of respective risk factor management with 95% confidence interval are shown above. Each subgroup was dichotomized and the reference group is denoted with an asterisk. P-value less than 0.05 was considered statistically significant. LDL – low density lipoprotein.

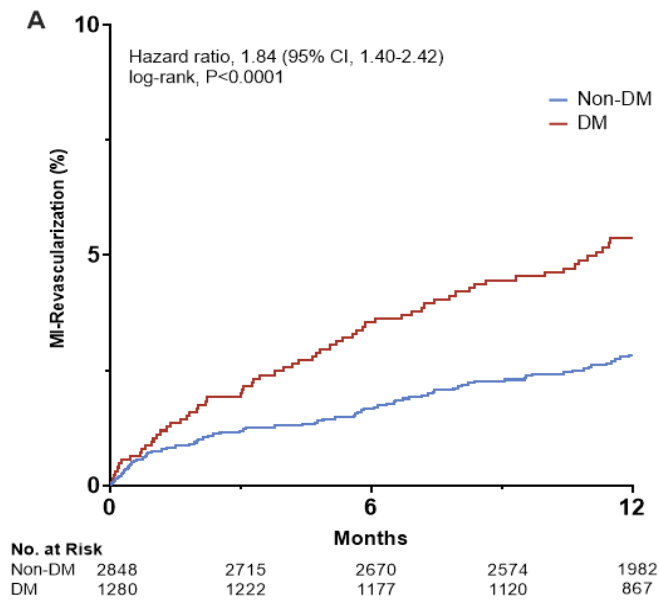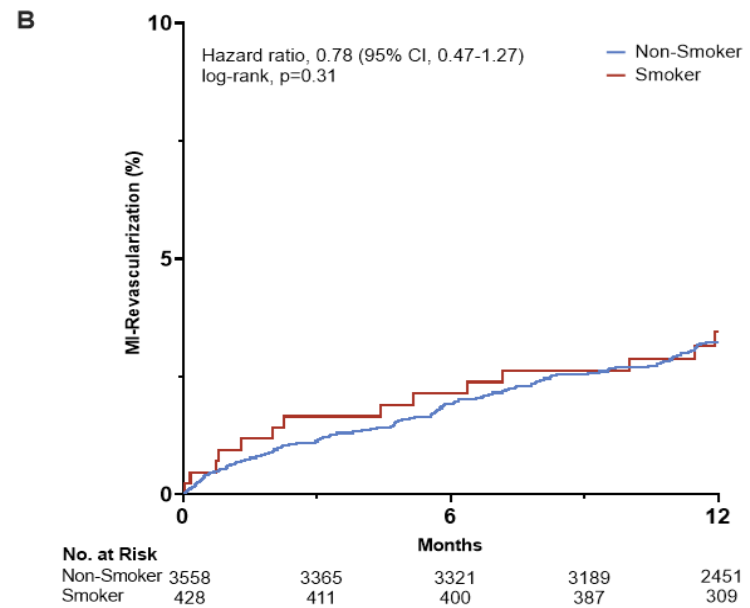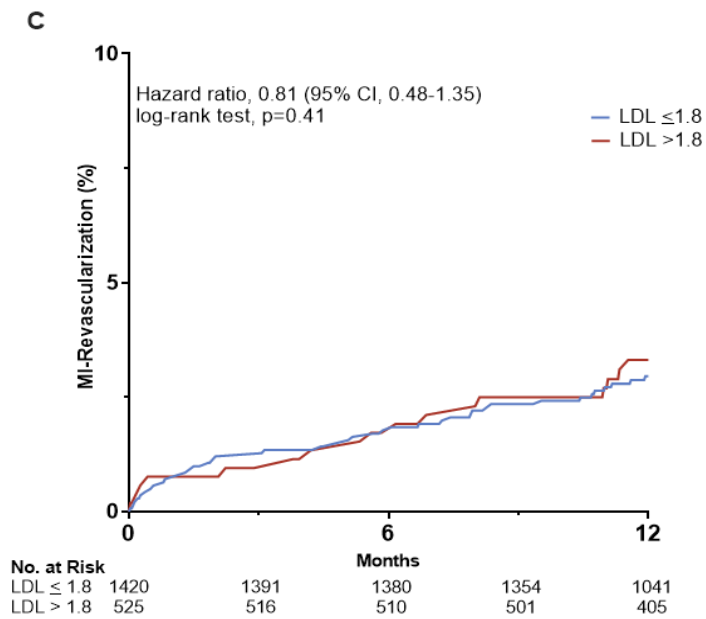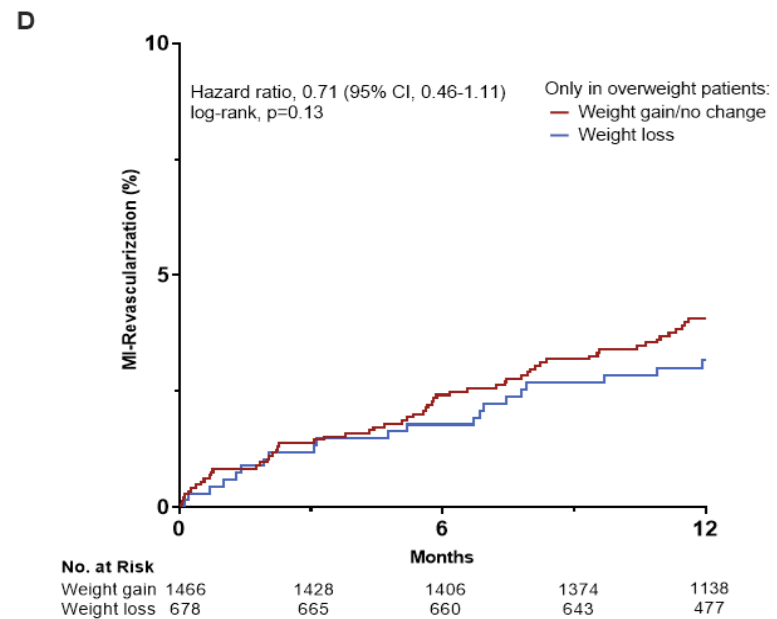

**Supplemental Figure 5. Association of modifiable risk factors with clinical outcomes**

**(A)** Patients with diabetes had elevated rates of myocardial infarction and unplanned revascularization (MI-revascularization) (hazard ratio, 1.84; 95% CI, 1.40 to 2.42; p<0.0001).

**(B)** Active smoking was not associated with increased rates of MI-revascularization (hazard ratio, 0.78; 95% CI, 0.47 to 1.27; p=0.31). **(C)** LDL control ≤1.8 mmol/L was not associated with MI-revascularization (hazard ratio, 0.81; 95% CI, 0.48 to 1.35; p=0.41). **(D)** Weight loss in overweight patients was not associated with MI-revascularization

(hazard ratio, 0.71; 95% CI, 0.46 to 1.11; p=0.13). Kaplan-Meier curves were generated and compared by log-rank test and hazard ratios were evaluated using the Cox proportional hazards model. P<0.05 is considered statistically significant.

**Supplemental Table 1. Clinical outcomes associated with gender**

|              | <b>Unadjusted HR (95% CI)</b> | <b>Adjusted HR (95% CI)*</b> |
|--------------|-------------------------------|------------------------------|
| <b>MACE</b>  | 1.52 (1.25-1.85)              | 1.21 (0.97-1.52)             |
| <b>Death</b> | 1.90 (1.46-2.47)              | 1.30 (0.96-1.75)             |

Reference for gender is male

\*Adjusted for age, acute coronary syndrome, type 2 diabetes, active smoking, dyslipidemia, hypertension, congestive heart failure, and obesity
